# Supplementary material for: PKCδ silencing alleviates saturated fatty acid induced ER stress by enhancing SERCA activity
Source: PubMed Central journal article supplement (PMC5700272; doi:10.1042/bsr20170869), 2017-11-23

**Oil Red O Staining area (%)**

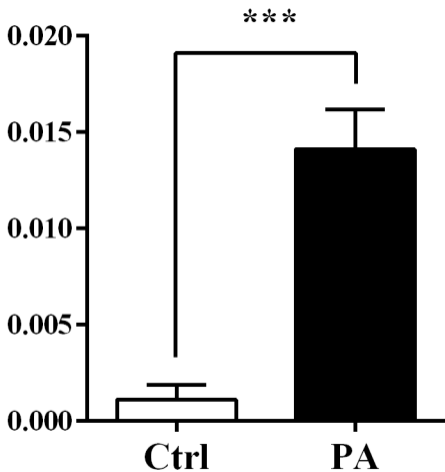

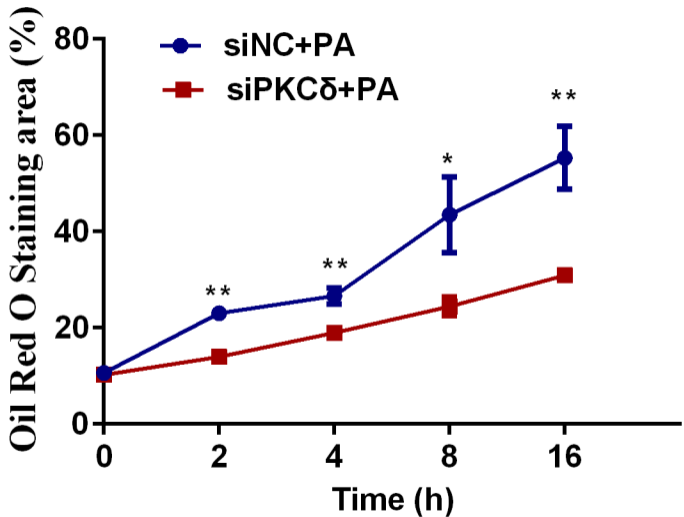

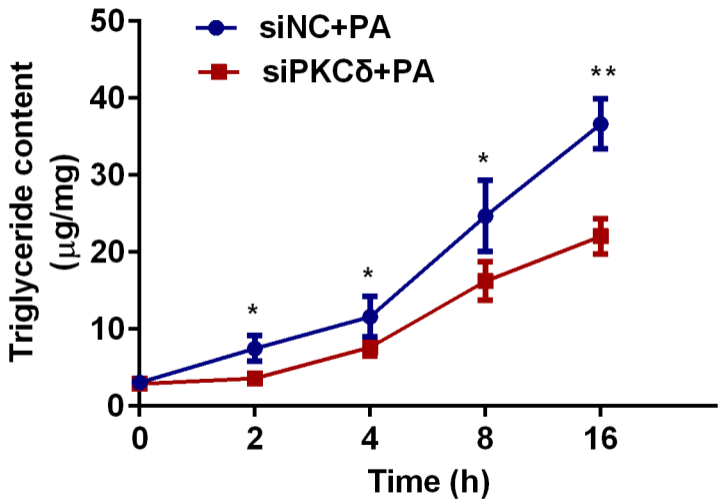

■ Ctrl    ■ siNC    ■ siPKC $\delta$

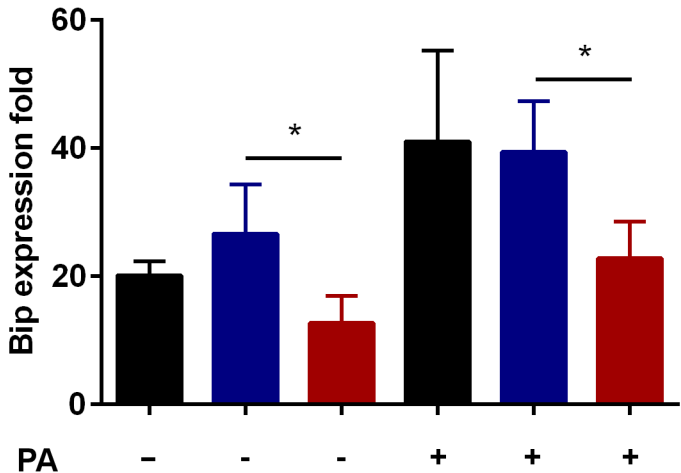

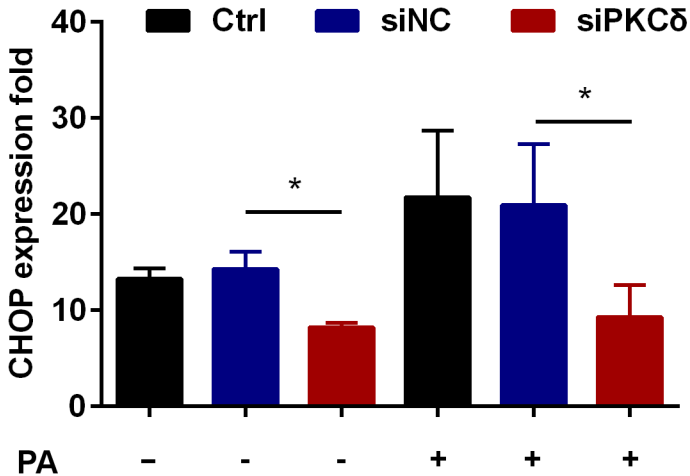

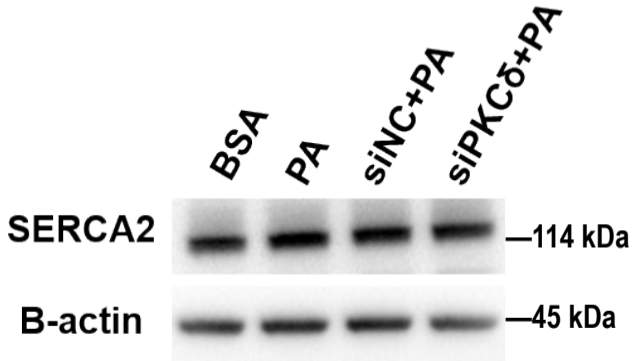

Supplement: bsr20170869_Supp1.pdf [file bsr20170869_Supp1.pdf]
